# Supplementary material
Source: PubMed Central journal article supplement (PMC5699446)
Supplement: NIHMS920036-supplement-Supplementary_Figure_7.pdf [file NIHMS920036-supplement-Supplementary_Figure_7.pdf]

## Supplementary Figure 7 : SMARCA4 effect on cell proliferation.

From: Recurrent SMARCA4 mutations in small cell carcinoma of the ovary

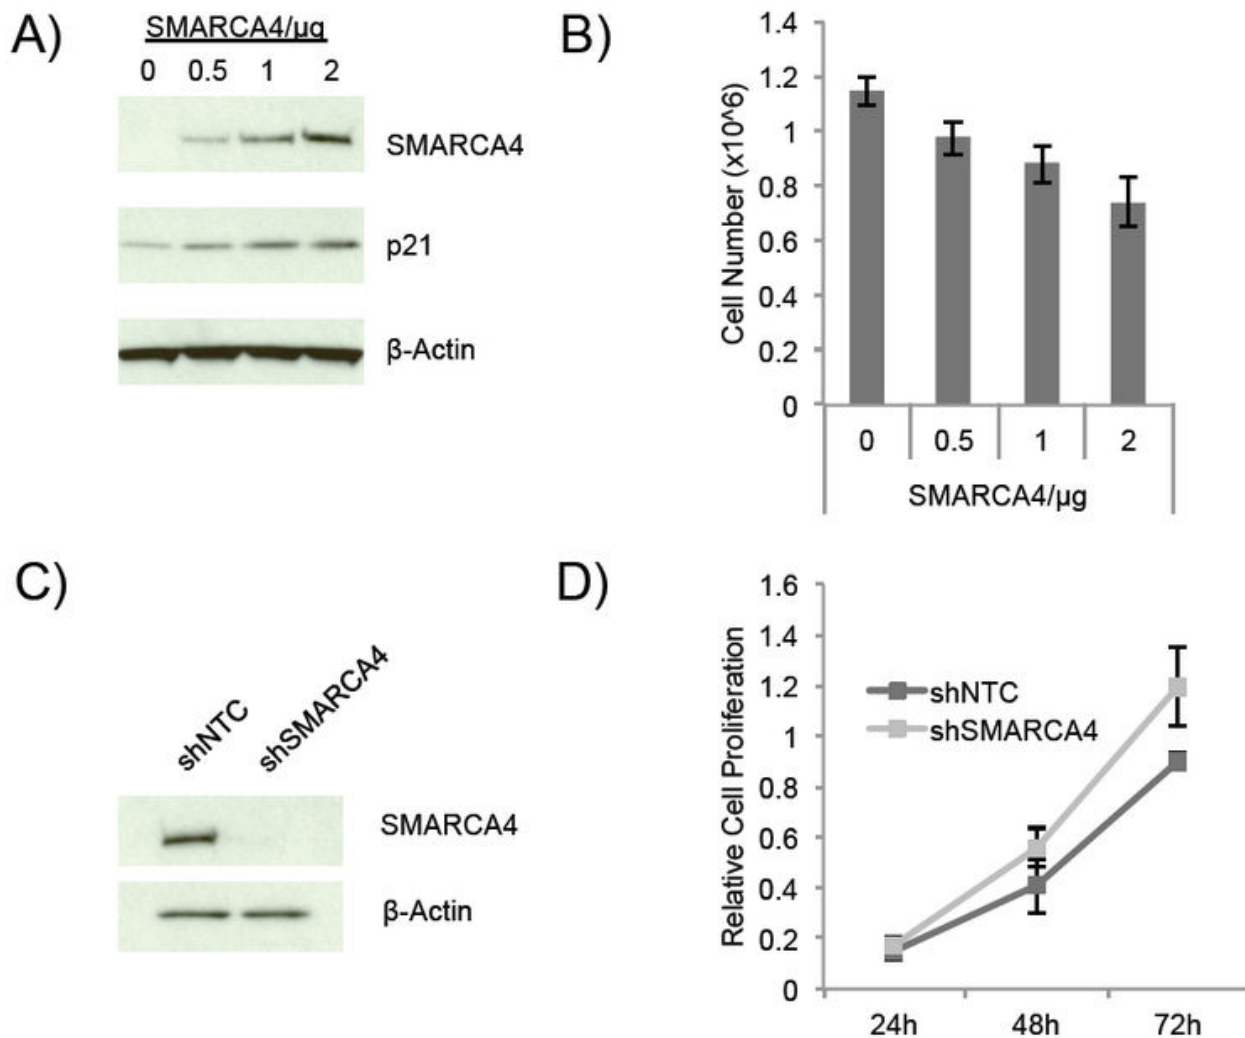

SMARCA4 overexpression in H1299 cells. Representative immunoblot from three biologic replicates demonstrates a correlation between increased SMARCA4 and p21 expression (Panel A). Cell growth assessment in H1299 cells overexpressing SMARCA4. Mean cell counts from three biologic replicates (Panel B). Representative immunoblot confirmed SMARCA4 knockdown in 293T cells using shRNA. As a control, shNTC (Non-Targeting Control) was used (Panel C). XTT proliferation assay in 293T cells depleted of SMARCA4. Means represent three independent experiments (Panel D).

*Nature Genetics* ISSN 1546-1718 (online)

---

**SPRINGER NATURE**

© 2017 Macmillan Publishers Limited, part of Springer Nature. All rights reserved.
